# Supplementary material for: Nanoscale control of silks for nanofibrous scaffold formation with an improved porous structure
Source: Royal Society of Chemistry journal article supplement (doi:10.1039/c4tb00019f), 2014-01-01
Supplement: c4tb00019f1.pdf [file c4tb00019f1.pdf]

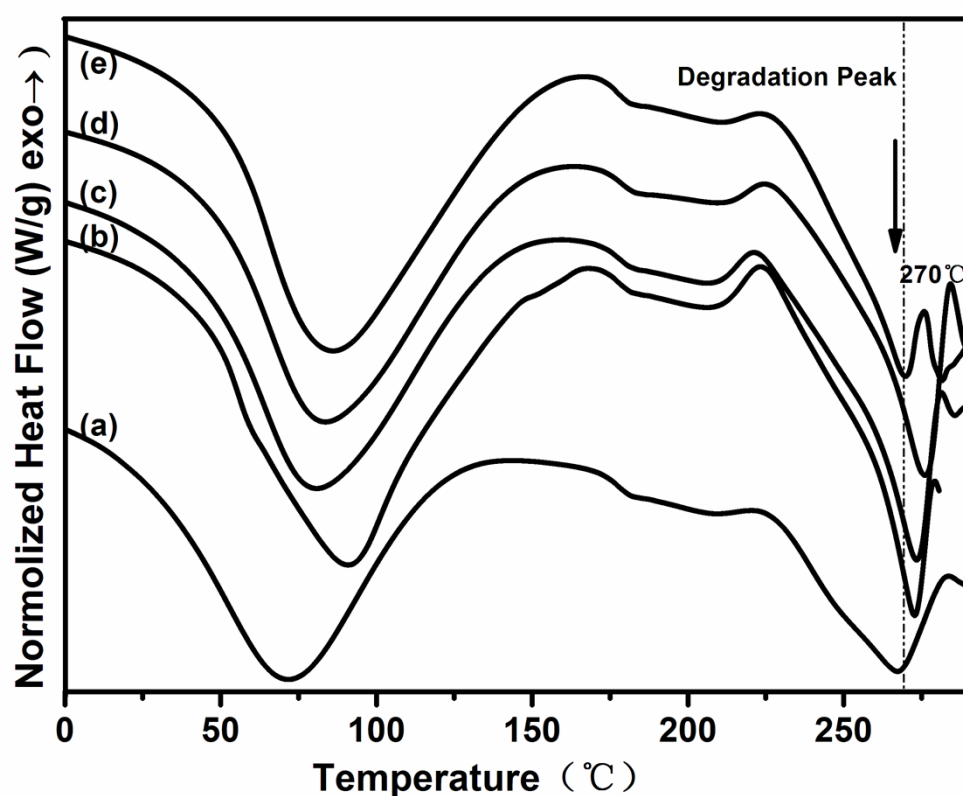

**Fig. S1.** DSC curves of different scaffolds: (a) scaffolds derived from fresh silk fibroin solution, SF-0-S; (b) scaffolds derived from the solution after drying-dissolving cycle one time, SF-1-S; (c) scaffolds derived from the solution after drying-dissolving cycle two times, SF-2-S; (d) scaffolds derived from the solution after drying-dissolving cycle three times, SF-3-S; and (e) scaffolds derived from the solution after drying-dissolving cycle four times, SF-4-S.
